# Supplementary material for: MicroRNA biomarker identification for pediatric acute myeloid leukemia based on a novel bioinformatics model
Source: PubMed Central journal article supplement (PMC4694912; doi:10.18632/oncotarget.4459), 2015-07-01
Supplement: oncotarget-06-26424-s001.pdf [file oncotarget-06-26424-s001.pdf]

**SUPPLEMENTARY DATA****Supplementary Table S1. Summary of gene expression datasets used in this study**

|                      | <b>MicroRNA Dataset</b> | <b>Gene Dataset</b>                  |
|----------------------|-------------------------|--------------------------------------|
| <b>GEO Accession</b> | GSE35320                | GSE43176                             |
| <b>AML</b>           | 102                     | 104                                  |
| <b>Healthy</b>       | 2                       | 4                                    |
| <b>Age</b>           | <18 years-old           | Not available                        |
| <b>PMID</b>          | 23418555                | 23733505                             |
| <b>Tissue</b>        | Blood Or Bone Marrow    | Peripheral Blood: 31 Bone Marrow: 73 |

**Supplementary Table S2. 34 primary childhood acute myeloid leukemia samples information**

| No     | French-American-British classification | Sex    | Month |
|--------|----------------------------------------|--------|-------|
| AML 1  | M5                                     | Female | 20    |
| AML 2  | M4                                     | Female | 95    |
| AML 3  | M4                                     | Female | 34    |
| AML 4  | M5                                     | Male   | 124   |
| AML 5  | M5                                     | Male   | 79    |
| AML 6  | M4                                     | Female | 129   |
| AML 7  | M6                                     | Male   | 120   |
| AML 8  | M2                                     | Female | 43    |
| AML 9  | AML                                    | Female | 88    |
| AML 10 | M5                                     | Female | 15    |
| AML 11 | M5                                     | Female | 24    |
| AML 12 | M5                                     | Female | 31    |
| AML 13 | M4                                     | Female | 12    |
| AML 14 | M2                                     | Male   | 157   |
| AML 15 | M5                                     | Female | 35    |
| AML 16 | M2                                     | Female | 117   |
| AML 17 | M3                                     | Male   | 121   |
| AML 18 | M5                                     | Female | 67    |
| AML 19 | M4                                     | Female | 84    |
| AML 20 | M4                                     | Female | 112   |
| AML 21 | M2                                     | Male   | 73    |
| AML 22 | M2                                     | Male   | 87    |
| AML 23 | M2                                     | Female | 100   |
| AML 24 | M5                                     | Male   | 71    |
| AML 25 | AML                                    | Female | 17    |
| AML 26 | M2                                     | Male   | 98    |
| AML 27 | M2                                     | Female | 60    |
| AML 28 | M5                                     | Male   | 6     |
| AML 29 | M2                                     | Male   | 109   |
| AML 30 | M2                                     | Male   | 116   |
| AML 31 | AML                                    | Male   | 4     |
| AML 32 | M2                                     | Male   | 91    |
| AML 33 | M2                                     | Male   | 146   |
| AML 34 | M2                                     | Male   | 118   |

**Supplementary Table S3. 30 control samples information**

| No | non-malignant Disease | Sex | Month |
|----|-----------------------|-----|-------|
| 1  | infectious disease    | M   | 60    |
| 2  | infectious disease    | M   | 12    |
| 3  | ITP                   | F   | 84    |
| 4  | ITP                   | F   | 84    |
| 5  | ITP                   | F   | 108   |
| 6  | ITP                   | M   | 24    |
| 7  | ITP                   | M   | 72    |
| 8  | infectious disease    | F   | 6     |
| 9  | ITP                   | F   | 18    |
| 10 | ITP                   | F   | 120   |
| 11 | ITP                   | M   | 1     |
| 12 | ITP                   | F   | 12    |
| 13 | ITP                   | M   | 60    |
| 14 | ITP                   | F   | 60    |
| 15 | ITP                   | F   | 84    |
| 16 | ITP                   | F   | 72    |
| 17 | ITP                   | M   | 72    |
| 18 | ITP                   | F   | 24    |
| 19 | infectious disease    | F   | 120   |
| 20 | ITP                   | F   | 132   |
| 21 | ITP                   | M   | 36    |
| 22 | infectious disease    | F   | 12    |
| 23 | ITP                   | F   | 12    |
| 24 | infectious disease    | M   | 72    |
| 25 | ITP                   | M   | 48    |
| 26 | ITP                   | M   | 120   |
| 27 | hemolytic anemia      | M   | 12    |
| 28 | ITP                   | M   | 84    |
| 29 | healthy donor         | M   | 72    |
| 30 | ITP                   | F   | 84    |

ITP: idiopathic thrombocytopenic purpura

**Supplementary Table S4. Previously reported microRNA biomarkers in Cancer**

| ID       | Cancer Name | Sample Type                         | Origin  | PMID     | Year | Expression Pattern | Validation Method                            |
|----------|-------------|-------------------------------------|---------|----------|------|--------------------|----------------------------------------------|
| let-7b   | Pca         | Tissue                              | Germany | 23798998 | 2013 | Down               | qRT-PCR                                      |
| let-7d   | Pca         | Tissue                              | China   | 20873592 | 2010 | Down               | ISH and TMA                                  |
| let-7f   | LC          | Serum                               | China   | 24697119 | 2014 | Down               | Real-time qRT-PCR                            |
| let-7g   | Pca         | Tissue                              | China   | 20873592 | 2010 | Down               | ISH and TMA                                  |
| miR-1    | GC          | Serum                               | China   | 21112772 | 2011 | Up                 | qRT-PCR                                      |
| miR-1    | Pca         | Cell lines<br>Tissue                | USA     | 22210864 | 2012 | Down               | qRT-PCR                                      |
| miR-1    | LC          | Serum                               | Germany | 23810247 | 2013 | Down               | Real-time qRT-PCR                            |
| miR-100  | Pca         | Tissue                              | Brazil  | 21255804 | 2011 | Up                 | qRT-PCR                                      |
| miR-100  | Leukaemia   | Bone marrow<br>mononuclear<br>cells | China   | 23055746 | 2012 | Up                 | Real-time qRT-PCR                            |
| miR-100  | LC          | Tissue                              | China   | 23842624 | 2013 | Down               | qRT-PCR                                      |
| miR-100  | EC          | Tissue                              | China   | 24651474 | 2014 | Up                 | qRT-PCR                                      |
| miR-101  | CRC         | Tissue                              | USA     | 22930392 | 2013 | Down               | RT-PCR                                       |
| miR-101  | LC          | Tissue                              | China   | 23178713 | 2012 | Down               | qRT-PCR                                      |
| miR-101  | LC          | Serum Tissues                       | China   | 24260081 | 2013 | Up                 | Real-time qRT-PCR                            |
| miR-105  | Pca         | Cell lines                          | Canada  | 23950948 | 2013 | Up                 | Real-time qPCR                               |
| miR-106a | GC          | Tissue                              | China   | 18996365 | 2009 | Up                 | Real-time qRT-PCR                            |
| miR-106a | GC          | Tissue                              | China   | 23335180 | 2013 | Up                 | Real-time qRT-PCR                            |
| miR-106a | CRC         | Fecal occult<br>blood               | Japan   | 23950216 | 2013 | Up                 | Real-time qRT-PCR                            |
| miR-106b | GC          | Plasma                              | China   | 23307259 | 2013 | Up                 | qRT-PCR                                      |
| miR-106b | GC          | Serum                               | Japan   | 24104965 | 2013 | Up                 | qRT-PCR                                      |
| miR-107  | GC          | Tissue                              | Japan   | 22407237 | 2012 | Up                 | Real-time PCR-based<br>miRNA profiling array |
| miR-10b  | PC          | Tissue                              | USA     | 21652542 | 2011 | Up                 | Fluorescence-based<br>ISH                    |
| miR-10b  | CRC         | Tissue                              | Japan   | 22322955 | 2012 | Up                 | Real-time qRT-PCR                            |
| miR-122  | LC          | Serum                               | China   | 22174818 | 2011 | Up                 | qRT-PCR                                      |
| miR-122  | CRC         | Tissue                              | Japan   | 23373973 | 2013 | Up                 | RT-PCR                                       |
| miR-122  | LC          | Serum                               | Germany | 23810247 | 2013 | Down               | Real-time qRT-PCR                            |
| miR-122  | GC          | Plasma                              | China   | 24481716 | 2014 | Down               | qRT-PCR                                      |
| miR-122a | LC          | Serum                               | China   | 23723713 | 2013 | Down               | qRT-PCR                                      |
| miR-124  | LC          | Cell lines                          | China   | 24211205 | 2013 | Up                 | Real-time qPCR                               |

(Continued)

| ID          | Cancer Name | Sample Type                        | Origin    | PMID     | Year | Expression Pattern | Validation Method |
|-------------|-------------|------------------------------------|-----------|----------|------|--------------------|-------------------|
| miR-1246    | EC          | Serum                              | Japan     | 23361059 | 2013 | Up                 | Real-time qPCR    |
| miR-1247    | PC          | Tissue                             | China     | 24588767 | 2014 | Down               | ISH               |
| miR-125a    | LC          | Tissue                             | China     | 22768249 | 2012 | Up                 | Real-time qPCR    |
| miR-125a-3p | GC          | Tissue                             | Japan     | 22322911 | 2012 | Down               | Real-time qRT-PCR |
| miR-125a-5p | GC          | Tissue                             | Japan     | 21220473 | 2011 | Down               | Real-time qRT-PCR |
| miR-125b    | CRC         | Tissue                             | Japan     | 21399871 | 2011 | Up                 | Real-time qRT-PCR |
| miR-125b-5p | LC          | Plasma                             | Turkey    | 24595450 | 2014 | Up                 | qRT-PCR           |
| miR-126     | Leukaemia   | Peripheral blood mononuclear cells | Japan     | 22884882 | 2012 | Down               | qRT-PCR           |
| miR-126     | Pca         | Tissue                             | China     | 24350576 | 2013 | Down               | qRT-PCR           |
| miR-126     | CRC         | Tissue                             | China     | 24532280 | 2014 | Down               | Real-time qPCR    |
| miR-126     | CRC         | Serum                              | China     | 24653631 | 2014 | Down               | Real-time qPCR    |
| miR-130b    | LC          | Serum                              | Hong Kong | 22403344 | 2012 | Up                 | Real-time qRT-PCR |
| miR-130b    | PC          | Tissue Cell line                   | China     | 24040078 | 2013 | Down               | Real-time qRT-PCR |
| miR-130b    | CRC         | Cell lines                         | USA       | 24204200 | 2013 | Up                 | qRT-PCR           |
| miR-133b    | CRC         | Tissue                             | Sweden    | 21573504 | 2011 | Down               | Real-time qPCR    |
| MiR-133b    | Pca         | Tissue                             | China     | 24610824 | 2014 | Up                 | Real-time qRT-PCR |
| miR-135a    | Leukaemia   | Bone marrow Peripheral blood       | Spain     | 24072101 | 2013 | Down               | Real-time qPCR    |
| miR-137     | CRC         | Tissue                             | China     | 23275153 | 2013 | Down               | Real-time qRT-PCR |
| miR-138     | NC          | Tissue                             | China     | 22739938 | 2012 | Down               | Real-time qRT-PCR |
| miR-139     | LC          | Plasma                             | China     | 24549282 | 2014 | Down               | qRT-PCR           |
| miR-141     | CRC         | Plasma                             | USA       | 21445232 | 2011 | Up                 | qRT-PCR           |
| miR-141     | Pca         | Plasma                             | USA       | 21723797 | 2011 | Up                 | qRT-PCR           |
| miR-141     | Pca         | Serum                              | USA       | 22887127 | 2013 | Up                 | Real-time qPCR    |
| miR-141     | CRC         | Serum                              | China     | 24653631 | 2014 | Up                 | Real-time qPCR    |
| miR-142-3p  | Leukaemia   | Peripheral blood mononuclear cells | China     | 21678057 | 2012 | Down               | Real-time qRT-PCR |

(Continued)

| ID          | Cancer Name | Sample Type                        | Origin    | PMID     | Year | Expression Pattern | Validation Method   |
|-------------|-------------|------------------------------------|-----------|----------|------|--------------------|---------------------|
| miR-142-5p  | GC          | Tissue                             | China     | 21343377 | 2011 | Down               | Real-time qPCR      |
| miR-143     | Pca         | Tissue                             | China     | 21647377 | 2011 | Down               | qRT-PCR             |
| miR-143     | GC          | Tissue                             | China     | 21874264 | 2011 | Down               | Real-time qRT-PCR   |
| miR-143     | CRC         | Tissue                             | China     | 22273643 | 2012 | Down               | TaqMan miRNA assays |
| miR-143     | PC          | Tissue                             | Italy     | 22836856 | 2012 | Down               | Real-time qRT-PCR   |
| miR-143     | GC          | Tissue                             | Japan     | 24283360 | 2014 | Up                 | qRT-PCR             |
| miR-144     | CRC         | Tissue                             | Japan     | 22983984 | 2012 | Down               | Real-time qRT-PCR   |
| miR-144*    | CRC         | Tissue                             | Italy     | 21863218 | 2011 | Up                 | Real-time qRT-PCR   |
| miR-145     | Pca         | Tissue                             | China     | 21647377 | 2011 | Down               | qRT-PCR             |
| miR-145     | CRC         | Tissue                             | China     | 22273643 | 2012 | Down               | TaqMan miRNA assays |
| miR-145     | Pca         | Tissue                             | Greece    | 23703249 | 2013 | Down               | Real-time qPCR      |
| miR-146a    | GC          | Tissue                             | China     | 22020746 | 2012 | Up                 | qRT-PCR             |
| miR-146a    | LC          | Tissue                             | China     | 24172202 | 2014 | Down               | Real-time qRT-PCR   |
| miR-146b-3p | Pca         | Tissue                             | Australia | 23846169 | 2013 | Up                 | qRT-PCR             |
| miR-148a    | LC          | Tissue                             | Hong Kong | 22496917 | 2012 | Up                 | Real-time qRT-PCR   |
| miR-148a    | CRC         | Tissue                             | Spain     | 23056401 | 2013 | Down               | Real-time qRT-PCR   |
| miR-148a    | PC          | Tissue                             | USA       | 23933230 | 2013 | Down               | Real-time qRT-PCR   |
| miR-148a    | GC          | Tissue                             | China     | 24527072 | 2014 | Down               | qPCR                |
| miR-150     | CRC         | Tissue                             | China     | 22052060 | 2012 | Down               | qRT-PCR             |
| miR-150     | Leukaemia   | Plasma                             | Belgium   | 23391324 | 2013 | Down               | real-time qRT-PCR   |
| miR-155     | PC          | Pancreatic juicetissue             | Japan     | 21068491 | 2010 | Up                 | Real-time qRT-PCR   |
| miR-155     | CRC         | Tissue                             | Japan     | 21412018 | 2010 | Up                 | RT-qPCR             |
| miR-155     | LC          | Tissue                             | China     | 22071603 | 2012 | Up                 | qRT-PCR             |
| miR-155     | LC          | Tissue                             | Taiwan    | 22629365 | 2012 | Up                 | Real-time qRT-PCR   |
| miR-155     | PC          | Tissue                             | Greece    | 22850622 | 2013 | Up                 | Real-time qRT-PCR   |
| miR-155     | Leukaemia   | Peripheral blood mononuclear cells | Japan     | 22884882 | 2012 | Up                 | qRT-PCR             |
| miR-155     | LAC         | Tissue                             | China     | 23437123 | 2013 | Up                 | Real-time qPCR      |
| miR-155     | GEDC        | Tissue                             | Japan     | 23660842 | 2013 | Up                 | real-time qRT-PCR   |
| miR-155     | LC          | Tissue                             | China     | 23863669 | 2013 | Up                 | qPCR                |

(Continued)

| ID         | Cancer Name | Sample Type          | Origin    | PMID     | Year | Expression Pattern | Validation Method |
|------------|-------------|----------------------|-----------|----------|------|--------------------|-------------------|
| miR-15b    | LC          | Serum                | Hong Kong | 22403344 | 2012 | Up                 | Real-time qRT-PCR |
| miR-16     | Leukaemia   | Lymph node           | China     | 23260326 | 2013 | Up                 | Real-time qRT-PCR |
| miR-16     | CRC         | Tissue               | China     | 24045965 | 2013 | Down               | qRT-PCR           |
| miR-16     | GC          | Plasma               | China     | 24595006 | 2014 | Up                 | qRT-PCR           |
| miR-16     | LC          | Serum                | China     | 24697119 | 2014 | Down               | Real-time qRT-PCR |
| miR-17     | CRC         | Tissue               | China     | 22065543 | 2012 | Up                 | Real-time qRT-PCR |
| miR-17     | NC          | Serum                | China     | 23056289 | 2012 | Up                 | Real-time qPCR    |
| miR-17-5p  | GC          | Plasma               | China     | 22406928 | 2012 | Up                 | Real-time qRT-PCR |
| miR-17-5p  | LC          | Tissue               | China     | 22583011 | 2012 | Up                 | qRT-PCR           |
| miR-17-5p  | LC          | Serum                | China     | 23108086 | 2013 | Up                 | qRT-PCR           |
| miR-181b   | Leukaemia   | Leukemic cells       | USA       | 21636858 | 2011 | Down               | Real-time qPCR    |
| miR-181b   | PC          | Stool                | China     | 22504911 | 2012 | Up                 | qRT-PCR           |
| miR-181b   | GC          | Tissue               | China     | 21876743 | 2011 | Up                 | Real-time qRT-PCR |
| miR-181b-5 | Leukaemia   | Serum                | China     | 23437222 | 2013 | Up                 | qRT-PCR           |
| miR-181c   | GC          | Tissue               | China     | 23425811 | 2013 | Up                 | real-time qRT-PCR |
| miR-181c   | GC          | Plasma               | China     | 23803080 | 2013 | Up                 | Real-time qRT-PCR |
| miR-182    | Pca         | Tissue               | China     | 20873592 | 2010 | Down               | ISH and TMA       |
| miR-182    | GC          | Tissue               | China     | 21874264 | 2011 | Up                 | Real-time qRT-PCR |
| miR-182    | LC          | Tissue               | China     | 22681717 | 2012 | Up                 | qRT-PCR           |
| miR-182    | CRC         | Tissue               | China     | 23474644 | 2013 | Up                 | Real-time qPCR    |
| miR-182-5p | Pca         | Tissue               | Japan     | 23184537 | 2013 | Up                 | Real-time qRT-PCR |
| miR-182-5p | Pca         | Tissue               | USA       | 23383207 | 2013 | Up                 | real-time qRT-PCR |
| miR-183    | Pca         | Tissue               | China     | 20873592 | 2010 | Down               | ISH and TMA       |
| miR-183    | Pca         | Cell lines           | USA       | 23538390 | 2013 | Up                 | Real-time qPCR    |
| miR-183    | CRC         | Tissue               | China     | 24150523 | 2014 | Up                 | Real-time qPCR    |
| miR-184    | TSCC        | Tissue               | Hong Kong | 18451220 | 2008 | Up                 | Real-time qPCR    |
| miR-185    | CRC         | Tissue               | Sweden    | 21573504 | 2011 | Up                 | Real-time qPCR    |
| miR-185    | LC          | Tissue               | China     | 23648054 | 2013 | Up                 | qRT-PCR           |
| miR-18a    | LC          | Serum                | China     | 22865399 | 2012 | Up                 | Real-time qRT-PCR |
| miR-18a    | NC          | Cell lines<br>Tissue | China     | 23097559 | 2013 | Up                 | Real-time qRT-PCR |
| miR-18a    | EC          | Plasma               | Japan     | 23579215 | 2013 | Up                 | qRT-PCR           |
| miR-18a    | CRC         | Tissue               | Spain     | 23673725 | 2013 | Up                 | Real-time qPCR    |

(Continued)

| ID                  | Cancer Name | Sample Type                         | Origin    | PMID     | Year | Expression Pattern | Validation Method |
|---------------------|-------------|-------------------------------------|-----------|----------|------|--------------------|-------------------|
| miR-18a             | GC          | Plasma                              | Japan     | 24626859 | 2014 | Up                 | qRT-PCR           |
| miR-18a             | CRC         | Plasma                              | China     | 24649179 | 2013 | Up                 | Real-time qRT-PCR |
| miR-18b             | LC          | Tissue                              | Japan     | 23496901 | 2013 | Up                 | Real-time qPCR    |
| miR-191             | GC          | Tissue Serum                        | China     | 24603541 | 2014 | Up                 | qRT-PCR           |
| miR-192             | GC          | Tissue                              | China     | 22205577 | 2012 | Down               | Real-Time PCR     |
| miR-192             | PC          | Tissue                              | China     | 23612862 | 2013 | Up                 | Real-time qPCR    |
| miR-192             | GC          | Plasma                              | China     | 24481716 | 2014 | Up                 | qRT-PCR           |
| miR-192/<br>miR-194 | PC          | Tissue                              | China     | 24398877 | 2014 | Up                 | Real-time qPCR    |
| miR-194             | Pca         | Tissue                              | Australia | 23846169 | 2013 | Up                 | qRT-PCR           |
| miR-195             | CRC         | Tissue                              | China     | 21390519 | 2012 | Up                 | Real-time qRT-PCR |
| miR-195             | GC          | Tissue                              | China     | 21987613 | 2011 | Up                 | Real-time qRT-PCR |
| miR-195             | GC          | Tissue                              | Israel    | 22046085 | 2011 | Up                 | Real-Time qPCR    |
| miR-196a            | EC          | Tissue                              | USA       | 19342367 | 2009 | Up                 | Real-time qPCR    |
| miR-196a            | PC          | Serum                               | China     | 20614181 | 2011 | Up                 | Real-time qRT-PCR |
| miR-196a            | PC          | Tissue                              | USA       | 23933230 | 2013 | Up                 | Real-time qRT-PCR |
| miR-196a            | LAC         | Tissue                              | Japan     | 23967217 | 2013 | Up                 | Real-time qPCR    |
| miR-196a            | GC          | Tissue                              | China     | 24527072 | 2014 | Up                 | qPCR              |
| miR-196b            | PC          | Tissue                              | USA       | 22114139 | 2012 | Up                 | Real-time qRT-PCR |
| miR-196b            | Leukaemia   | Bone marrow;<br>Peripheral<br>blood | Spain     | 24072101 | 2013 | Up                 | Real-time qPCR    |
| miR-198             | PC          | Tissue                              | USA       | 23989979 | 2013 | Down               | Real-time qRT-PCR |
| miR-199a-<br>3p     | GC          | Tissue                              | Israel    | 22046085 | 2011 | Up                 | Real-Time qPCR    |
| miR-199a-<br>3p     | GC          | Plasma                              | China     | 22956063 | 2013 | Up                 | Real-time qRT-PCR |
| miR-199a-<br>3p     | CRC         | Tissue                              | China     | 23292866 | 2013 | Up                 | Real-time qRT-PCR |
| miR-199a-<br>3p     | GC          | Tissue                              | China     | 23733518 | 2013 | Up                 | Real-time qRT-PCR |
| miR-19a             | LAC         | Tissue                              | China     | 24427326 | 2013 | Up                 | qPCR              |
| miR-20              | Pca         | Tissue                              | China     | 22994753 | 2012 | -                  | -                 |
| miR-200b            | Pca         | Tissue                              | China     | 24317363 | 2014 | Down               | Real-time qRT-PCR |
| miR-200c            | CRC         | Tissue                              | Germany   | 18079988 | 2006 | Up                 | qRT-PCR           |
| miR-200c            | PC          | Serum                               | Japan     | 20579395 | 2010 | Up                 | Real-time qRT-PCR |

(Continued)



| ID       | Cancer Name | Sample Type             | Origin        | PMID     | Year | Expression Pattern | Validation Method |
|----------|-------------|-------------------------|---------------|----------|------|--------------------|-------------------|
| miR-200c | CRC         | Tissue                  | Japan         | 22735571 | 2013 | Up                 | Real-time qPCR    |
| miR-200c | GC          | Plasma                  | Spain         | 22954417 | 2012 | Up                 | Real-time qRT-PCR |
| miR-200c | CRC         | Tissue                  | Japan         | 23982750 | 2014 | Up                 | qRT-PCR           |
| miR-200c | CRC         | Plasma                  | China         | 24649179 | 2013 | Up                 | Real-time qRT-PCR |
| miR-203  | PC          | Tissue                  | Japan         | 20652642 | 2010 | Up                 | qRT-PCR           |
| miR-203  | Pca         | Cell lines              | Italy         | 21368580 | 2011 | Down               | qRT-PCR           |
| miR-203  | LC          | Tissue                  | China         | 21786180 | 2012 | Down               | qRT-PCR           |
| miR-203  | EC          | Tissue                  | NA            | 24519530 | 2014 | Down               | NA                |
| miR-203  | PC          | Cell line               | China         | 24520289 | 2014 | Up                 | qPCR              |
| miR-203  | LAC         | Tissue                  | China         | 24682952 | 2014 | Down               | qRT-PCR           |
| miR-205  | EC          | Cell lines              | Japan         | 20428818 | 2010 | Up                 | Real-time qRT-PCR |
| miR-205  | Pca         | Tissue                  | Australia     | 22869146 | 2013 | Down               | qRT-PCR           |
| miR-205  | Pca         | Tissue                  | USA           | 24167554 | 2013 | Down               | Real-time qPCR    |
| miR-205  | LAC         | Tissue                  | China         | 24297308 | 2014 | Down               | Real-time qPCR    |
| miR-206  | GC          | Tissue                  | China         | 23751352 | 2013 | Down               | qRT-PCR           |
| miR-20a  | GC          | Serum                   | China         | 21112772 | 2011 | Up                 | qRT-PCR           |
| miR-20a  | Pca         | Plasma                  | USA           | 22298119 | 2012 | Up                 | qRT-PCR           |
| miR-20a  | GC          | Plasma                  | China         | 22406928 | 2012 | Up                 | Real-time qRT-PCR |
| miR-20a  | NC          | Serum                   | China         | 23056289 | 2012 | Up                 | Real-time qPCR    |
| miR-20a  | GC          | Plasma                  | China         | 23307259 | 2013 | Up                 | qRT-PCR           |
| miR-20a  | LC          | Tissue                  | China         | 23594563 | 2013 | Down               | Real-time qPCR    |
| miR-21   | GC          | Tissue                  | China         | 18507035 | 2008 | Up                 | qPCR              |
| miR-21   | TSCC        | Tissue                  | China         | 19509158 | 2009 | Up                 | qRT-PCR           |
| miR-21   | CRC         | Tissue                  | USA and HK    | 19737943 | 2009 | Up                 | qRT-PCR           |
| miR-21   | EC          | Tissue                  | USA and Japan | 19789312 | 2009 | Up                 | qRT-PCR           |
| miR-21   | PC          | Pancreatic juice Tissue | Japan         | 21068491 | 2010 | Up                 | Real-time qRT-PCR |
| miR-21   | CRC         | Tissue                  | Japan         | 21412018 | 2010 | Up                 | RT-qPCR           |
| miR-21   | LC          | Plasma                  | Japan         | 21749846 | 2012 | Up                 | qRT-PCR           |
| miR-21   | GC          | Tissue                  | China         | 21876743 | 2011 | Up                 | Real-time qRT-PCR |
| miR-21   | CRC         | Stool samples           | China         | 21930727 | 2014 | Up                 | Real-time qRT-PCR |
| miR-21   | Pca         | Tissue                  | China         | 22341810 | 2012 | Up                 | ISH and TMA       |

(Continued)

| ID      | Cancer Name | Sample Type | Origin | PMID     | Year | Expression Pattern | Validation Method |
|---------|-------------|-------------|--------|----------|------|--------------------|-------------------|
| miR-21  | GC          | Serum       | China  | 22430134 | 2011 | Up                 | Real-time qRT-PCR |
| miR-21  | PC          | Tissue      | Italy  | 22836856 | 2012 | Down               | Real-time qRT-PCR |
| miR-21  | PC          | Tissue      | Greece | 22850622 | 2013 | Up                 | Real-time qRT-PCR |
| miR-21  | GC          | Plasma      | China  | 22860003 | 2012 | Up                 | qRT-PCR           |
| miR-21  | CRC         | Plasma      | USA    | 22868372 | 2012 | Up                 | Real-time qPCR    |
| miR-21  | PC          | Tissue      | Italy  | 23139258 | 2013 | Up                 | qRT-PCR           |
| miR-21  | LAC         | Tissue      | China  | 23259291 | 2012 | Up                 | qRT-PCR           |
| miR-21  | GC          | Plasma      | Japan  | 23267156 | 2013 | Up                 | qRT-PCR           |
| miR-21  | GC          | Tissue      | China  | 23335180 | 2013 | Up                 | real-time qRT-PCR |
| miR-21  | CRC         | Serum       | China  | 23625654 | 2013 | Up                 | real-time qRT-PCR |
| miR-21  | CRC         | Serum       | Japan  | 23704278 | 2013 | Up                 | qRT-PCR           |
| miR-21  | CRC         | Serum       | Spain  | 23970420 | 2013 | Down               | qRT-PCR           |
| miR-21  | GC          | Serum       | Japan  | 24104965 | 2013 | Up                 | qRT-PCR           |
| miR-21  | GEDC        | Plasma      | Japan  | 24118467 | 2013 | Up                 | qRT-PCR           |
| miR-21  | CRC         | Tissue      | Japan  | 24122631 | 2014 | Up                 | qRT-PCR           |
| miR-21  | GC          | Plasma      | China  | 24460332 | 2013 | Down               | Real-time qRT-PCR |
| miR-21  | EC          | Tissue      | NA     | 24519530 | 2014 | Up                 | NA                |
| miR-21  | CRC         | Serum       | China  | 24653631 | 2014 | Up                 | Real-time qPCR    |
| miR-21  | LC          | Serum       | China  | 24697119 | 2014 | Down               | Real-time qRT-PCR |
| miR-210 | PC          | Plasma      | USA    | 20360935 | 2010 | Up                 | qRT-PCR           |
| miR-210 | PC          | Stool       | China  | 22504911 | 2012 | Up                 | qRT-PCR           |
| miR-210 | CRC         | Tissue      | China  | 24632577 | 2014 | Up                 | Real-time qPCR    |
| miR-211 | PC          | Tissue      | Italy  | 23155457 | 2012 | Down               | qRT-PCR           |
| miR-212 | GC          | Tissue      | China  | 21987613 | 2011 | Up                 | Real-time qRT-PCR |
| miR-214 | LC          | Tissue      | China  | 23962428 | 2013 | Down               | Real-time qPCR    |
| miR-214 | Pca         | Tissue      | USA    | 24167554 | 2013 | Down               | Real-time qPCR    |
| miR-214 | GC          | Tissue      | China  | 24614175 | 2014 | Down               | Real-time qPCR    |
| miR-214 | CRC         | Tissue      | China  | 24616020 | 2014 | Down               | qRT-PCR           |
| miR-215 | CRC         | Tissue      | USA    | 21752725 | 2011 | Down               | Real-time qPCR    |
| miR-215 | GC          | Tissue      | China  | 22205577 | 2012 | Down               | Real-Time PCR     |
| miR-215 | CRC         | Tissue      | China  | 23532818 | 2013 | Down               | Real-time qPCR    |
| miR-215 | GC          | Tissue      | China  | 23981575 | 2014 | Up                 | Real-time qPCR    |
| miR-217 | PC          | Tissue      | USA    | 23933230 | 2013 | Down               | Real-time qRT-PCR |
| miR-218 | GC          | Plasma      | China  | 22860003 | 2012 | Down               | qRT-PCR           |

(Continued)

| ID         | Cancer Name | Sample Type                        | Origin  | PMID     | Year | Expression Pattern | Validation Method |
|------------|-------------|------------------------------------|---------|----------|------|--------------------|-------------------|
| miR-218    | CRC         | Tissue                             | China   | 24294377 | 2013 | Up                 | qRT-PCR           |
| miR-22     | CRC         | Tissue                             | China   | 22492279 | 2012 | Down               | Real-time qRT-PCR |
| miR-22     | GC          | Tissue                             | China   | 23786758 | 2013 | Down               | qRT-PCR           |
| miR-221    | Pca         | Tissue                             | Germany | 19585579 | 2010 | Down               | qRT-PCR           |
| miR-221    | CRC         | Plasma                             | China   | 20880178 | 2010 | Up                 | qRT-PCR           |
| miR-221    | GC          | Serum                              | China   | 22432036 | 2012 | Up                 | Real-time qRT-PCR |
| miR-221    | GC          | Plasma                             | China   | 23307259 | 2013 | Up                 | qRT-PCR           |
| miR-221    | PC          | Tissue                             | Japan   | 23329235 | 2013 | Up                 | qRT-PCR           |
| miR-223    | GC          | Plasma                             | China   | 22860003 | 2012 | Up                 | qRT-PCR           |
| miR-223    | NC          | Serum                              | China   | 23056289 | 2012 | Down               | Real-time qPCR    |
| miR-223-3p | LC          | Plasma                             | Turkey  | 24595450 | 2014 | Down               | qRT-PCR           |
| miR-224    | Pca         | Tissue                             | China   | 24382668 | 2013 | Down               | qRT-PCR           |
| miR-224    | Pca         | Tissue                             | Greece  | 23136246 | 2013 | Down               | Real-time qPCR    |
| miR-23a    | CRC         | Tissue                             | China   | 22455847 | 2012 | Up                 | ISH               |
| miR-25     | CRC         | Tissue                             | China   | 24293092 | 2014 | Up                 | Real-time qPCR    |
| miR-25     | GC          | Plasma                             | China   | 24595006 | 2014 | Up                 | qRT-PCR           |
| miR-25     | EC          | Tissue                             | China   | 24651474 | 2014 | Up                 | qRT-PCR           |
| miR-26a    | LC          | Tissue                             | China   | 23389848 | 2013 | Down               | Real-time qPCR    |
| miR-26a    | LC          | Tissue                             | China   | 24259426 | 2013 | Up                 | Real-time qPCR    |
| miR-26a    | TSCC        | Tissue                             | China   | 24343426 | 2013 | Down               | qRT-PCR           |
| miR-27a    | GC          | Serum                              | China   | 21112772 | 2011 | Up                 | qRT-PCR           |
| miR-27a    | GC          | Plasma                             | China   | 24122958 | 2014 | Up                 | qRT-PCR           |
| miR-27a-3p | PC          | Peripheral blood mononuclear cells | China   | 23430754 | 2013 | Up                 | qRT-PCR           |
| miR-29     | GC          | Tissue                             | China   | 24130168 | 2014 | Down               | Real-time qPCR    |
| miR-29a    | CRC         | Plasma                             | China   | 19876917 | 2010 | Up                 | Real-time qRT-PCR |
| miR-29a    | Leukaemia   | Peripheral blood mononuclear cells | China   | 21678057 | 2012 | Down               | Real-time qRT-PCR |
| miR-29a    | CRC         | Serum                              | China   | 22018950 | 2012 | Up                 | Real-time qRT-PCR |
| miR-29a    | Leukaemia   | Bone marrow mononuclear cells      | China   | 22981932 | 2013 | Down               | Real-time qPCR    |

(Continued)

| ID         | Cancer Name | Sample Type                         | Origin            | PMID     | Year | Expression Pattern | Validation Method |
|------------|-------------|-------------------------------------|-------------------|----------|------|--------------------|-------------------|
| miR-29a    | CRC         | Tissue                              | Spain             | 23673725 | 2013 | Up                 | Real-time qPCR    |
| miR-29a-5p | LC          | Tissue                              | China             | 23285022 | 2012 | Up                 | Real-time qPCR    |
| miR-29b    | Pca         | Cell lines                          | USA               | 22402125 | 2012 | Down               | Real-time qRT-PCR |
| miR-29c    | NC          | Serum                               | China             | 23056289 | 2012 | Down               | Real-time qPCR    |
| miR-30c    | Pca         | Tissue                              | China             | 24452717 | 2014 | Down               | Real-time qPCR    |
| miR-30d    | Pca         | Cell lines                          | Japan             | 23231923 | 2012 | Up                 | Real-time qRT-PCR |
| miR-31     | EC          | Tissue                              | China             | 21658006 | 2011 | Up                 | Real-time qRT-PCR |
| miR-31     | EC          | Tissue                              | NA                | 22302717 | 2012 | Down               | Real-time qPCR    |
| miR-31     | GC          | Tissue                              | China             | 19598010 | 2010 | Down               | Real-time qRT-PCR |
| miR-32     | GC          | Tissue                              | China             | 21874264 | 2011 | Up                 | Real-time qRT-PCR |
| miR-32     | Pca         | Cell line<br>Tissue                 | Finland           | 22266859 | 2012 | Up                 | qRT-PCR           |
| miR-32     | CRC         | Tissue                              | China             | 24123284 | 2013 | Up                 | Real-time qRT-PCR |
| miR-320a   | GC          | Serum                               | China             | 23521833 | 2013 | Down               | qRT-PCR           |
| miR-335    | GC          | Tissue                              | China             | 22802949 | 2012 | Up                 | Real-time qRT-PCR |
| miR-335    | GEDC        | Tissue                              | China             | 24250228 | 2013 | Down               | Real-time qRT-PCR |
| miR-338-3p | GC          | Cell lines                          | China             | 23826132 | 2013 | Down               | qPCR              |
| miR-34     | GC          | Serum                               | China             | 21112772 | 2011 | Up                 | qRT-PCR           |
| miR-342    | Leukaemia   | Plasma                              | Belgium           | 23391324 | 2013 | Down               | real-time qRT-PCR |
| miR-34a    | CRC         | Tissue                              | China             | 23355243 | 2013 | Down               | RT-PCR            |
| miR-34a    | Pca         | Cell lines                          | -                 | 20687223 | 2010 | Up                 | Real-time qRT-PCR |
| miR-362-3p | CRC         | Tissue                              | Denmark           | 23280316 | 2013 | Up                 | RT-qPCR           |
| miR-363    | CRC         | Tissue                              | China             | 24519049 | 2014 | Down               | qRT-PCR           |
| miR-372    | LC          | Tissue                              | China             | 23291979 | 2013 | Up                 | qRT-PCR           |
| miR-374b   | Pca         | Tissue                              | China             | 24191917 | 2013 | Down               | qRT-PCR           |
| miR-375    | EC          | Tissue                              | USA and<br>Canada | 19789312 | 2009 | Down               | qRT-PCR           |
| miR-375    | GC          | Tissue                              | China             | 21343377 | 2011 | Up                 | Real-time qPCR    |
| miR-375    | EC          | Tissue                              | NA                | 22302717 | 2012 | Down               | Real-time qPCR    |
| miR-375    | Pca         | Serum                               | USA               | 22887127 | 2013 | Up                 | Real-time qPCR    |
| miR-375    | GC          | Tissue                              | China             | 23461060 | 2012 | Down               | real-time qRT-PCR |
| miR-375    | Leukaemia   | Bone marrow<br>mononuclear<br>cells | China             | 23864342 | 2013 | Up                 | Real-time qRT-PCR |
| miR-375    | PC          | Tissue                              | China             | 24648956 | 2013 | Down               | Real-time PCR     |

(Continued)

| ID         | Cancer Name | Sample Type                      | Origin  | PMID     | Year | Expression Pattern | Validation Method       |
|------------|-------------|----------------------------------|---------|----------|------|--------------------|-------------------------|
| miR-376c   | GC          | Serum                            | China   | 22432036 | 2012 | Up                 | Real-time qRT-PCR       |
| miR-378    | GC          | Serum                            | China   | 22169097 | 2012 | Up                 | Real-time qRT-PCR       |
| miR-378    | CRC         | Tissue                           | Italy   | 24423916 | 2014 | Up                 | qRT-PCR                 |
| miR-378*   | Pca         | Serum                            | USA     | 22887127 | 2013 | Up                 | Real-time qPCR          |
| miR-409-3p | Pca         | Serum                            | USA     | 22887127 | 2013 | Down               | Real-time qPCR          |
| miR-409-3p | Leukaemia   | Bone marrow;<br>Peripheral blood | Spain   | 24072101 | 2013 | Down               | Real-time qPCR          |
| miR-421    | GC          | Tissue                           | China   | 19802518 | 2010 | Up                 | RT-PCR                  |
| miR-421    | GC          | Plasma                           | China   | 22263628 | 2012 | Up                 | Real-time qRT-PCR       |
| miR-421    | GC          | Gastric juices                   | China   | 22926798 | 2012 | Down               | Real-time qRT-PCR       |
| miR-423-5p | GC          | Serum                            | China   | 21112772 | 2011 | Up                 | qRT-PCR                 |
| miR-429    | CRC         | Tissue                           | China   | 23111103 | 2013 | Up                 | Real-time qRT-PCR       |
| miR-429    | CRC         | Tissue                           | China   | 24237355 | 2014 | Down               | Real-time qPCR          |
| miR-429    | CRC         | Tissue                           | Spain   | 24510588 | 2014 | Down               | TaqMan Expression Assay |
| miR-449a   | CRC         | Tissue                           | China   | 24396489 | 2014 | Up                 | Real-time qPCR          |
| miR-451    | GC          | Tissue                           | Israel  | 22046085 | 2011 | Up                 | Real-Time qPCR          |
| miR-451    | GC          | Plasma                           | China   | 24595006 | 2014 | Up                 | qRT-PCR                 |
| miR-4723   | Pca         | Tissue                           | USA     | 24223753 | 2013 | Down               | Real-time qPCR          |
| miR-483-5p | LC          | Plasma                           | USA     | 24127413 | 2013 | Up                 | Real-time qPCR          |
| miR-486-5p | GC          | Plasma                           | China   | 24595006 | 2014 | Up                 | qRT-PCR                 |
| miR-490-5p | CRC         | Tissue                           | China   | 24519049 | 2014 | Down               | qRT-PCR                 |
| miR-492    | LC          | Tissue                           | Germany | 21319197 | 2011 | Up                 | Real-time qPCR          |
| miR-548d   | PC          | Cell line                        | Germany | 21946813 | 2012 | Up                 | -                       |
| miR-574-3p | GC          | Tissue                           | China   | 22683180 | 2012 | Down               | Real-time qPCR          |
| miR-601    | CRC         | Plasma                           | China   | 22970209 | 2012 | Down               | qRT-PCR                 |
| miR-625    | CRC         | Tissue                           | China   | 23861214 | 2013 | Down               | qRT-PCR                 |
| miR-628-5p | Pca         | Serum                            | USA     | 24477576 | 2014 | Down               | qRT-PCR                 |
| miR-630    | GC          | Tissue                           | China   | 24621930 | 2014 | Up                 | Real-time qPCR          |
| miR-638    | GC          | Plasma                           | China   | 24623314 | 2014 | Down               | Real-time qRT-PCR       |
| miR-644    | Leukaemia   | Bone marrow;<br>Peripheral blood | Spain   | 24072101 | 2013 | Up                 | Real-time qPCR          |
| miR-648    | Pca         | Tissue                           | China   | 24618011 | 2014 | Down               | qPCR                    |
| miR-708    | Pca         | Cell lines                       | USA     | 22552290 | 2012 | Down               | qRT-PCR                 |

(Continued)

| ID                  | Cancer Name | Sample Type                        | Origin | PMID     | Year | Expression Pattern | Validation Method                                     |
|---------------------|-------------|------------------------------------|--------|----------|------|--------------------|-------------------------------------------------------|
| miR-744             | GC          | Serum                              | China  | 22432036 | 2012 | Up                 | Real-time qRT-PCR                                     |
| miR-760             | CRC         | Plasma                             | China  | 22970209 | 2012 | Down               | qRT-PCR                                               |
| miR-888             | Pca         | Cell lines                         | USA    | 24200968 | 2014 | Up                 | qRT-PCR                                               |
| miR-9               | GEDC        | Bile                               | Japan  | 21858175 | 2011 | Up                 | High-throughput real-time PCR-based miRNA microarrays |
| miR-9               | NC          | Serum                              | China  | 24327016 | 2014 | Down               | qRT-PCR                                               |
| miR-92              | CRC         | Tissue                             | China  | 19201770 | 2009 | Up                 | Real-time qRT-PCR                                     |
| miR-92a             | CRC         | Plasma                             | China  | 19876917 | 2010 | Up                 | Real-time qRT-PCR                                     |
| miR-92a             | Leukaemia   | Peripheral blood mononuclear cells | Japan  | 21182798 | 2010 | Down               | qRT-PCR                                               |
| miR-92a             | CRC         | Stool samples                      | China  | 21930727 | 2013 | Up                 | Real-time qRT-PCR                                     |
| miR-92a             | CRC         | Tissue                             | China  | 22772712 | 2013 | Up                 | Real-time qRT-PCR                                     |
| miR-92a             | CRC         | Serum                              | China  | 23625654 | 2013 | Up                 | real-time qRT-PCR                                     |
| miR-92a             | GC          | Tissue                             | China  | 23868977 | 2013 | Down               | Real-time qPCR                                        |
| miR-92a             | GC          | Plasma                             | China  | 24595006 | 2014 | Up                 | qRT-PCR                                               |
| miR-92a/<br>miR-638 | Leukaemia   | Whole blood                        | Japan  | 19440243 | 2009 | Down               | qRT-PCR                                               |
| miR-93              | GC          | Tissue                             | China  | 22567743 | 2012 | Up                 | Real-time qRT-PCR                                     |
| miR-96              | Pca         | Tissue                             | China  | 20873592 | 2010 | Down               | ISH and TMA                                           |
| miR-96              | Leukaemia   | Bone marrow or peripheral blood    | China  | 24678958 | 2014 | Down               | Real-time qRT-PCR                                     |
| miR-98              | Pca         | Tissue                             | China  | 20873592 | 2010 | Down               | ISH and TMA                                           |
| miR-98              | Pca         | Cell lines                         | USA    | 23188821 | 2013 | Up                 | qPCR                                                  |

126 microRNA Biomarkers were collected from the literature that reported in 11 types of cancers.

ISH: in situ hybridization

TMA: technology of tissue microarray

qRT-PCR: quantitative reverse transcriptase-PCR

qPCR: quantitative PCR

TSCC: Tongue squamous cell carcinoma

PCa: Prostate cancer

CRC: Colorectum cancer

GC: Gastric Cancer

EC: Esophagus cancer

GEDC: Gallbladder and extrahepatic ducts cancer

LAC: Larynx cancer

LC: Liver cancer

PC: Pancreatic cancer

**Supplementary Table S5. Edge list of Pediatric AML Specific microRNA-mRNA network &**

| microRNA | Gene    |
|----------|---------|
| let-7a   | APP     |
| let-7a   | LIN28A  |
| let-7a   | GNG5    |
| let-7a   | ACPI    |
| let-7a   | C14orf2 |
| let-7a   | RAVER2  |
| let-7a   | E2F1    |
| let-7a   | HNRPDL  |
| let-7a   | PDIA3   |
| let-7a   | CCT3    |
| let-7a   | SNRPD1  |
| let-7a   | KRAS    |
| let-7a   | RASAL2  |
| let-7a   | TMEM66  |
| let-7a   | ACTL6A  |
| let-7a   | RPL35A  |
| let-7a   | NARS2   |
| let-7f   | APP     |
| let-7f   | PDIA3   |
| let-7f   | NARS2   |
| let-7f   | FDPS    |
| let-7f   | ZBTB10  |
| let-7f   | TMEM66  |
| let-7f   | SNRPD1  |
| let-7f   | UFC1    |
| let-7f   | RASAL2  |
| let-7f   | GNG5    |
| let-7f   | ACTL6A  |
| let-7f   | CCT3    |
| miR-10a  | RABEP1  |
| miR-10a  | RAP2A   |
| miR-10a  | ATP5F1  |
| miR-10a  | GTF2I   |
| miR-10a  | SMC1A   |
| miR-10a  | ST7L    |

(Continued)

| <b>microRNA</b> | <b>Gene</b> |
|-----------------|-------------|
| miR-10a         | WRN         |
| miR-10a         | SEC61B      |
| miR-10a         | MKL2        |
| miR-10a         | TRIM2       |
| miR-10a         | LYZL6       |
| miR-10a         | TRO         |
| miR-10a         | LANCL1      |
| miR-10a         | ASPH        |
| miR-10a         | PDCL        |
| miR-10a         | SMCR7L      |
| miR-10a         | TMEM62      |
| miR-10a         | MTMR6       |
| miR-10a         | NSL1        |
| miR-10a         | RAPGEF2     |
| miR-10a         | ELOVL6      |
| miR-10a         | HLA-DPB1    |
| miR-10a         | SNX4        |
| miR-10a         | TCP1        |
| miR-10a         | USP34       |
| miR-10a         | H3F3B       |
| miR-10a         | GRAMD1B     |
| miR-10a         | E2F3        |
| miR-10a         | TSEN34      |
| miR-10a         | USF2        |
| miR-10a         | RPS29       |
| miR-10a         | MTF2        |
| miR-10a         | SS18L2      |
| miR-10a         | IGBP1       |
| miR-10a         | ELAVL2      |
| miR-155         | PRKCI       |
| miR-155         | HNRNPA3P1   |
| miR-155         | HNRNPA3P1   |
| miR-155         | CUX1        |
| miR-155         | RCN2        |
| miR-155         | TWF1        |
| miR-155         | PAPOLA      |
| miR-155         | MLH1        |

(Continued)



| microRNA | Gene     |
|----------|----------|
| miR-155  | RAPGEF2  |
| miR-155  | TRIP13   |
| miR-155  | FADS3    |
| miR-155  | TRIM32   |
| miR-155  | SH3BP4   |
| miR-155  | MSH6     |
| miR-155  | SMAD5    |
| miR-155  | KIAA0776 |
| miR-155  | POLE3    |
| miR-155  | KRAS     |
| miR-155  | SALL1    |
| miR-155  | PSMG1    |
| miR-155  | CAMTA1   |
| miR-155  | LDOC1    |
| miR-155  | CHAF1A   |
| miR-155  | FGF7     |
| miR-155  | VEZF1    |
| miR-155  | SMAD2    |
| miR-155  | DHX40    |
| miR-155  | MSH2     |
| miR-155  | DCAF7    |
| miR-155  | FADS1    |
| miR-155  | TBCA     |
| miR-155  | PKN2     |
| miR-155  | TMEM66   |
| miR-155  | UBE2J1   |
| miR-155  | MATR3    |
| miR-155  | ZNF236   |
| miR-155  | PELI1    |
| miR-155  | SMAD1    |
| miR-155  | DSG2     |
| miR-16   | GALNT7   |
| miR-16   | RECK     |
| miR-16   | KPNA3    |
| miR-16   | H3F3B    |
| miR-16   | TBP      |
| miR-16   | UBE2S    |

(Continued)

| microRNA | Gene    |
|----------|---------|
| miR-16   | COP2    |
| miR-16   | PPM1D   |
| miR-16   | TARBP2  |
| miR-16   | CCNT2   |
| miR-16   | PTCD3   |
| miR-16   | WBP5    |
| miR-16   | PNN     |
| miR-16   | NIPAL2  |
| miR-16   | CSHL1   |
| miR-16   | RAD51C  |
| miR-16   | SHOC2   |
| miR-16   | YTHDC1  |
| miR-16   | RARS    |
| miR-16   | PSMD7   |
| miR-16   | RBX1    |
| miR-16   | SLC7A1  |
| miR-16   | CEP63   |
| miR-16   | PLSCR4  |
| miR-16   | SLC12A2 |
| miR-16   | CEP55   |
| miR-16   | EIF4E   |
| miR-16   | MRPL20  |
| miR-16   | CDC23   |
| miR-16   | GPATCH8 |
| miR-16   | POLR3F  |
| miR-16   | DBNDD2  |
| miR-16   | PANX1   |
| miR-16   | PRIM1   |
| miR-16   | CRHBP   |
| miR-16   | AURKB   |
| miR-16   | NPR3    |
| miR-16   | HSPA4L  |
| miR-16   | RSBN1   |
| miR-16   | BRCA1   |
| miR-16   | MSH2    |
| miR-16   | TOMM34  |

(Continued)

| microRNA | Gene     |
|----------|----------|
| miR-16   | UGDH     |
| miR-16   | CHORDC1  |
| miR-16   | HBXIP    |
| miR-16   | SIAH1    |
| miR-16   | CDC14B   |
| miR-16   | C4orf27  |
| miR-16   | PMS1     |
| miR-16   | C2orf43  |
| miR-16   | ARL2     |
| miR-16   | ITGA2    |
| miR-16   | SERPINE2 |
| miR-16   | ZBTB10   |
| miR-16   | WBP11    |
| miR-16   | ISOC1    |
| miR-16   | STXBP3   |
| miR-16   | HSDL2    |
| miR-16   | TMEM100  |
| miR-181b | PDIA6    |
| miR-181b | FBXO34   |
| miR-181b | RNF6     |
| miR-181b | PLAG1    |
| miR-181b | C20orf29 |
| miR-181b | SS18L2   |
| miR-181b | TMF1     |
| miR-181b | ZFAND6   |
| miR-181b | CDCA4    |
| miR-181b | PAWR     |
| miR-181b | GRIA2    |
| miR-181b | PRDM4    |
| miR-191  | GAP43    |
| miR-191  | REPS1    |
| miR-191  | SOX4     |
| miR-191  | SEH1L    |
| miR-191  | LUC7L2   |
| miR-191  | SP3      |
| miR-191  | TOMM20   |
| miR-191  | PEG10    |

(Continued)

| microRNA | Gene    |
|----------|---------|
| miR-191  | CAND1   |
| miR-191  | SF1     |
| miR-191  | FUBP3   |
| miR-191  | BCL11A  |
| miR-191  | ATP5F1  |
| miR-191  | SLC23A2 |
| miR-191  | YAP1    |
| miR-191  | TSPAN13 |
| miR-191  | ELOVL5  |
| miR-191  | SMARCA4 |
| miR-191  | MORF4L2 |
| miR-191  | HNRPDL  |
| miR-191  | DUSP11  |
| miR-191  | CAPZA1  |
| miR-191  | TIMM17A |
| miR-191  | PDE6D   |
| miR-191  | USP34   |
| miR-191  | MORF4L1 |
| miR-191  | RNF139  |
| miR-196b | PER1    |
| miR-196b | SMC3    |
| miR-196b | SSR2    |
| miR-196b | WASF1   |
| miR-196b | RPL39L  |
| miR-196b | SLC35D2 |
| miR-196b | RAPGEF5 |
| miR-196b | TSPAN12 |
| miR-196b | ZZZ3    |
| miR-196b | TSPAN3  |
| miR-196b | KHDRBS3 |
| miR-196b | CRIM1   |
| miR-196b | CYP4B1  |
| miR-196b | PRMT3   |
| miR-196b | SMC1A   |
| miR-196b | ANKHD1  |
| miR-196b | PDE6D   |
| miR-196b | TMEM135 |

(Continued)

| microRNA | Gene     |
|----------|----------|
| miR-196b | LANCL1   |
| miR-196b | DYNC2LI1 |
| miR-196b | HEPH     |
| miR-196b | TMEM143  |
| miR-196b | RBM12    |
| miR-196b | NME4     |
| miR-196b | DYRK3    |
| miR-196b | BCL11A   |
| miR-196b | KCNJ2    |
| miR-196b | IGFBP7   |
| miR-196b | BCL7C    |
| miR-196b | SNX16    |
| miR-196b | NUP54    |
| miR-196b | WNT5A    |
| miR-196b | SSR1     |
| miR-196b | ZNF281   |
| miR-196b | RBM26    |
| miR-196b | ARID5B   |
| miR-196b | TRPC3    |
| miR-196b | TMEM66   |
| miR-196b | E2F3     |
| miR-196b | ASPH     |
| miR-196b | SRP9     |
| miR-196b | SMCR7L   |
| miR-196b | RAD23B   |
| miR-196b | EPHA7    |
| miR-196b | SNX4     |
| miR-196b | RNF138   |
| miR-196b | TMEM135  |
| miR-196b | LDOC1    |
| miR-19a  | ING3     |
| miR-19a  | NME4     |
| miR-19a  | MED4     |
| miR-19a  | PRKAA1   |
| miR-19a  | ZC3H15   |
| miR-19a  | MREG     |
| miR-19a  | LSM3     |

(Continued)

| <b>microRNA</b> | <b>Gene</b> |
|-----------------|-------------|
| miR-19a         | PRMT5       |
| miR-19a         | SMAD4       |
| miR-19a         | CAMTA1      |
| miR-19a         | FOXF2       |
| miR-19a         | RAPGEF2     |
| miR-19b         | RAPGEF2     |
| miR-19b         | PRKAA1      |
| miR-19b         | ARID4B      |
| miR-19b         | CAMTA1      |
| miR-19b         | VPS37B      |
| miR-19b         | FOXF2       |
| miR-19b         | SMARCD2     |
| miR-19b         | NME4        |
| miR-19b         | LSM3        |
| miR-19b         | MREG        |
| miR-19b         | RBBP7       |
| miR-19b         | SOX4        |
| miR-19b         | CLIP1       |
| miR-19b         | SLMO2       |
| miR-20a         | CROT        |
| miR-20a         | ATAD2       |
| miR-20a         | APP         |
| miR-20a         | BTG3        |
| miR-20a         | MICA        |
| miR-20a         | HIF1A       |
| miR-20a         | C19orf2     |
| miR-20a         | DDX5        |
| miR-20a         | E2F1        |
| miR-20a         | SGCE        |
| miR-20a         | E2F5        |
| miR-20a         | BNIP2       |
| miR-20a         | SMAD4       |
| miR-20a         | CENPQ       |
| miR-20a         | MRPL24      |
| miR-20a         | WBSCR22     |
| miR-20a         | PTPN4       |
| miR-20a         | SRP9        |

(Continued)

| microRNA | Gene    |
|----------|---------|
| miR-20a  | RNH1    |
| miR-20a  | GLO1    |
| miR-20a  | SACS    |
| miR-20a  | KIF23   |
| miR-218  | ITM2C   |
| miR-218  | MRPS27  |
| miR-218  | ARID4B  |
| miR-218  | TPD52   |
| miR-218  | RNF38   |
| miR-218  | RPL35   |
| miR-218  | EBP     |
| miR-218  | SSR1    |
| miR-221  | EIF1    |
| miR-221  | GPR107  |
| miR-221  | TCEAL1  |
| miR-221  | SSRP1   |
| miR-221  | DDIT4   |
| miR-223  | CENPN   |
| miR-223  | E2F1    |
| miR-223  | RBM3    |
| miR-223  | STMN1   |
| miR-223  | CCT3    |
| miR-223  | NDUFA5  |
| miR-223  | ZNF330  |
| miR-223  | RCN2    |
| miR-25   | GRAMD1B |
| miR-25   | FHL2    |
| miR-25   | NFIB    |
| miR-25   | VBPI    |
| miR-25   | CNNM1   |
| miR-25   | NOX4    |
| miR-25   | ANP32E  |
| miR-25   | NOVA1   |
| miR-25   | E2F3    |
| miR-25   | ITPR1   |
| miR-25   | TEAD1   |

(Continued)

| microRNA | Gene     |
|----------|----------|
| miR-25   | QSER1    |
| miR-25   | GALNT7   |
| miR-25   | FBXW7    |
| miR-25   | ADCY3    |
| miR-25   | DDIT4    |
| miR-25   | CIC      |
| miR-25   | TRIM36   |
| miR-25   | KLF12    |
| miR-25   | H3F3B    |
| miR-25   | PRDX3    |
| miR-25   | SERP1    |
| miR-25   | CCNC     |
| miR-25   | GPATCH8  |
| miR-25   | ZNF281   |
| miR-25   | NEFL     |
| miR-25   | CCNT2    |
| miR-25   | SLC7A11  |
| miR-25   | VDAC2    |
| miR-25   | PRPF40A  |
| miR-25   | SOX4     |
| miR-25   | BUB3     |
| miR-25   | RSBN1    |
| miR-25   | BCL11A   |
| miR-25   | KIAA1045 |
| miR-25   | FMR1     |
| miR-25   | DYRK2    |
| miR-25   | ATXN3    |
| miR-25   | ZNF238   |
| miR-25   | PA2G4    |
| miR-25   | MOAP1    |
| miR-25   | PRMT5    |
| miR-25   | PCDH11X  |
| miR-25   | MYCBP2   |
| miR-25   | GAP43    |
| miR-25   | COPS2    |
| miR-25   | TMF1     |
| miR-25   | SIP1     |

(Continued)



| microRNA | Gene     |
|----------|----------|
| miR-25   | STAG2    |
| miR-25   | CAMTA1   |
| miR-25   | SLC25A32 |
| miR-25   | CAND1    |
| miR-25   | HBS1L    |
| miR-25   | FAM120A  |
| miR-25   | CCT6A    |
| miR-25   | SMAD7    |
| miR-25   | HIVEP1   |
| miR-25   | PBLD     |
| miR-25   | ZNF804A  |
| miR-25   | DNAJB9   |
| miR-25   | ING3     |
| miR-25   | SLC6A1   |
| miR-26b  | DERL2    |
| miR-26b  | DDX52    |
| miR-26b  | MTX2     |
| miR-26b  | EPB41L3  |
| miR-26b  | KCNK1    |
| miR-26b  | NFYB     |
| miR-26b  | SFPQ     |
| miR-26b  | UBE2B    |
| miR-26b  | CNBP     |
| miR-26b  | METAP2   |
| miR-26b  | SLC19A2  |
| miR-26b  | LPHN2    |
| miR-26b  | TXNL1    |
| miR-26b  | RBBP6    |
| miR-26b  | LAP3     |
| miR-26b  | ZBTB10   |
| miR-26b  | SERP1    |
| miR-26b  | DDAH1    |
| miR-26b  | ART3     |
| miR-26b  | PAWR     |
| miR-26b  | TTK      |
| miR-26b  | B4GALT4  |
| miR-26b  | EZH2     |

(Continued)

| microRNA | Gene     |
|----------|----------|
| miR-26b  | MTMR4    |
| miR-26b  | SLC7A11  |
| miR-26b  | RCN2     |
| miR-26b  | TJP2     |
| miR-26b  | DHX29    |
| miR-26b  | NEFL     |
| miR-26b  | RAB28    |
| miR-26b  | PDHX     |
| miR-26b  | CREBZF   |
| miR-26b  | SFPQ     |
| miR-26b  | SNX7     |
| miR-26b  | WNT5A    |
| miR-26b  | PLOD2    |
| miR-26b  | NUP153   |
| miR-26b  | NUP54    |
| miR-26b  | CAPZA1   |
| miR-26b  | KIAA0947 |
| miR-26b  | SMAP1    |
| miR-26b  | OBFC2A   |
| miR-26b  | COX5A    |
| miR-26b  | PSMD10   |
| miR-26b  | FAM98A   |
| miR-26b  | CLTC     |
| miR-26b  | WBP11    |
| miR-26b  | RNF6     |
| miR-26b  | LEF1     |
| miR-26b  | COPS2    |
| miR-26b  | PTS      |
| miR-26b  | 15-Sep   |
| miR-26b  | ING3     |
| miR-26b  | PDE4B    |
| miR-26b  | MDH1     |
| miR-26b  | BCL7B    |
| miR-26b  | KIF23    |
| miR-26b  | OAT      |
| miR-26b  | MTMR1    |
| miR-26b  | ME1      |

(Continued)

| microRNA | Gene     |
|----------|----------|
| miR-26b  | RUFY3    |
| miR-26b  | COPS6    |
| miR-26b  | UCHL5    |
| miR-26b  | ATP5C1   |
| miR-26b  | PNRC1    |
| miR-26b  | ZNF259   |
| miR-26b  | ELAVL2   |
| miR-26b  | IARS     |
| miR-26b  | AGPAT5   |
| miR-26b  | SMC1A    |
| miR-26b  | RNMT     |
| miR-26b  | CHORDC1  |
| miR-26b  | SLBP     |
| miR-26b  | ZNF238   |
| miR-26b  | KPNA3    |
| miR-26b  | CKS2     |
| miR-26b  | SCFD1    |
| miR-26b  | SACS     |
| miR-26b  | TMEM66   |
| miR-26b  | BCL11A   |
| miR-26b  | ATP6V1G1 |
| miR-425  | RAPGEF2  |
| miR-425  | BTG3     |
| miR-425  | BACH2    |
| miR-425  | TRO      |
| miR-425  | STMN1    |
| miR-425  | MAP3K4   |
| miR-425  | ZFAND1   |
| miR-425  | PSIP1    |
| miR-425  | TERF1    |
| miR-425  | B4GALT4  |
| miR-425  | SMAD2    |
| miR-425  | PTGER3   |
| miR-425  | WTAP     |
| miR-425  | NSL1     |
| miR-425  | RINT1    |
| miR-425  | MDM1     |

(Continued)

| microRNA | Gene     |
|----------|----------|
| miR-425  | QSER1    |
| miR-425  | ATP5G3   |
| miR-425  | ASPH     |
| miR-425  | EBNA1BP2 |
| miR-425  | SLC16A1  |
| miR-425  | RABAC1   |
| miR-425  | BCOR     |
| miR-425  | FAM63B   |
| miR-425  | ELOVL5   |
| miR-425  | CCNT2    |
| miR-425  | PTP4A2   |
| miR-425  | CREBZF   |
| miR-425  | PRDX6    |
| miR-425  | MAP9     |
| miR-425  | PGAP1    |
| miR-425  | NOTCH1   |
| miR-92a  | SMAD4    |
| miR-92a  | MYCBP2   |
| miR-92a  | HBS1L    |
| miR-92a  | CIC      |
| miR-92a  | ANP32E   |
| miR-92a  | PUS7     |
| miR-92a  | TMF1     |
| miR-92a  | ARID4B   |
| miR-92a  | SIP1     |
| miR-92a  | FHL2     |
| miR-92a  | ITPR1    |
| miR-95   | RINT1    |
| miR-95   | PPP1CC   |
| miR-95   | YEATS4   |
| miR-95   | PSMD10   |
| miR-95   | VEZF1    |
| miR-95   | SOX4     |
| miR-95   | SF1      |
| miR-95   | USP6NL   |
| miR-95   | LEMD3    |

(Continued)

| microRNA | Gene     |
|----------|----------|
| miR-95   | SMAD4    |
| miR-95   | EID1     |
| miR-95   | FHL2     |
| miR-95   | SERP1    |
| miR-95   | TRPM3    |
| miR-95   | KIAA0528 |
| miR-95   | YTHDF2   |
| miR-95   | FASTKD2  |
| miR-95   | RBBP7    |
| miR-95   | CYP39A1  |
| miR-95   | EGLN3    |
| miR-95   | SLK      |
| miR-95   | PDE4B    |
| miR-95   | KCND2    |
| miR-95   | DNAJC15  |
| miR-95   | QKI      |
| miR-95   | PIGA     |
| miR-95   | ARID4B   |

\*The genes listed here is the unique target of the microRNA, here the unique target means the gene is only targeted by the microRNA and not by other microRNAs in the AML microRNA-mRNA network. The network was constructed by integrating the microRNA-mRNA network, microRNA expression data and mRNA expression data. Therefore the unique target sets is related to the concrete network in context.

**Supplementary Table S6. Candidate microRNA biomarkers and their target genes**

| microRNA-196b Targets |               |    | microRNA-155 Targets |               |    | microRNA-25 Targets |               |    |
|-----------------------|---------------|----|----------------------|---------------|----|---------------------|---------------|----|
| Gene                  | Unique Target | TF | Gene                 | Unique Target | TF | Gene                | Unique Target | TF |
| ANKHD1                | T             | F  | CAMTA1               | F             | T  | ADCY3               | T             | F  |
| ARID5B                | T             | T  | CHAF1A               | T             | F  | ANP32E              | F             | F  |
| ASPH                  | F             | F  | CUX1                 | T             | T  | ATXN3               | T             | F  |
| BCL11A                | F             | T  | DCAF7                | T             | F  | BCL11A              | F             | T  |
| BCL7C                 | T             | F  | DHX40                | T             | F  | BUB3                | T             | F  |
| CRIM1                 | T             | F  | DSG2                 | T             | F  | CAMTA1              | F             | T  |
| CYP4B1                | T             | F  | FADS1                | T             | F  | CAND1               | F             | F  |
| DYNC2LI1              | T             | F  | FADS3                | T             | F  | CCNC                | T             | F  |
| DYRK3                 | T             | F  | FGF7                 | T             | F  | CCNT2               | F             | F  |
| E2F3                  | F             | T  | HNRNPA3P1            | F             | F  | CCT6A               | T             | F  |
| EPHA7                 | T             | F  | KIAA0776             | T             | F  | CIC                 | F             | T  |
| HEPH                  | T             | F  | KRAS                 | F             | F  | CNNM1               | T             | F  |
| IGFBP7                | T             | F  | LDOC1                | F             | F  | COPS2               | F             | T  |
| KCNJ2                 | T             | F  | MATR3                | T             | T  | DDIT4               | F             | F  |
| KHDRBS3               | T             | F  | MLH1                 | T             | F  | DNAJB9              | T             | F  |
| LANCL1                | F             | F  | MSH2                 | F             | F  | DYRK2               | T             | F  |
| LDOC1                 | F             | F  | MSH6                 | T             | F  | E2F3                | F             | T  |
| NME4                  | F             | F  | PAPOLA               | T             | F  | FAM120A             | T             | F  |
| NUP54                 | F             | F  | PELI1                | T             | F  | FBXW7               | T             | F  |
| PDE6D                 | F             | F  | PKN2                 | T             | F  | FHL2                | F             | F  |
| PER1                  | T             | F  | POLE3                | T             | T  | FMR1                | T             | F  |
| PRMT3                 | T             | T  | PRKCI                | T             | F  | GALNT7              | F             | F  |
| RAD23B                | T             | F  | PSMG1                | T             | F  | GAP43               | F             | F  |
| RAPGEF5               | T             | T  | RAPGEF2              | F             | F  | GPATCH8             | F             | T  |
| RBM12                 | T             | F  | RCN2                 | F             | F  | GRAMD1B             | F             | F  |
| RBM26                 | T             | T  | SALL1                | T             | T  | H3F3B               | F             | F  |
| RNF138                | T             | T  | SH3BP4               | T             | F  | HBS1L               | F             | F  |
| RPL39L                | T             | F  | SMAD1                | T             | T  | HIVEP1              | T             | T  |
| SLC35D2               | T             | F  | SMAD2                | F             | T  | ING3                | F             | F  |
| SMC1A                 | F             | F  | SMAD5                | T             | T  | ITPR1               | F             | F  |
| SMC3                  | T             | F  | TBCA                 | T             | F  | KIAA1045            | T             | F  |
| SMCR7L                | F             | F  | TMEM66               | F             | F  | KLF12               | T             | T  |
| SNX16                 | T             | F  | TRIM32               | T             | T  | MOAP1               | T             | F  |
| SNX4                  | F             | F  | TRIP13               | T             | F  | MYCBP2              | F             | F  |

| microRNA-196b Targets |               |    | microRNA-155 Targets |               |    | microRNA-25 Targets |               |    |
|-----------------------|---------------|----|----------------------|---------------|----|---------------------|---------------|----|
| Gene                  | Unique Target | TF | Gene                 | Unique Target | TF | Gene                | Unique Target | TF |
| SRP9                  | F             | F  | TWF1                 | T             | F  | NEFL                | F             | F  |
| SSR1                  | F             | F  | UBE2J1               | T             | F  | NFIB                | T             | T  |
| SSR2                  | T             | F  | VEZF1                | F             | T  | NOVA1               | T             | F  |
| TMEM135               | F             | F  | ZNF236               | T             | T  | NOX4                | T             | F  |
| TMEM143               | T             | F  |                      |               |    | PA2G4               | T             | F  |
| TMEM66                | F             | F  |                      |               |    | PBLD                | T             | F  |
| TRPC3                 | T             | F  |                      |               |    | PCDH11X             | T             | F  |
| TSPAN12               | T             | F  |                      |               |    | PRDX3               | T             | F  |
| TSPAN3                | T             | F  |                      |               |    | PRMT5               | F             | F  |
| WASF1                 | T             | F  |                      |               |    | PRPF40A             | T             | F  |
| WNT5A                 | F             | F  |                      |               |    | QSER1               | F             | F  |
| ZNF281                | F             | T  |                      |               |    | RSBN1               | F             | F  |
| ZZZ3                  | T             | T  |                      |               |    | SERP1               | F             | F  |
|                       |               |    |                      |               |    | SIP1                | F             | F  |
|                       |               |    |                      |               |    | SLC25A32            | T             | F  |
|                       |               |    |                      |               |    | SLC6A1              | T             | F  |
|                       |               |    |                      |               |    | SLC7A11             | F             | F  |
|                       |               |    |                      |               |    | SMAD7               | T             | T  |
|                       |               |    |                      |               |    | SOX4                | F             | T  |
|                       |               |    |                      |               |    | STAG2               | T             | F  |
|                       |               |    |                      |               |    | TEAD1               | T             | T  |
|                       |               |    |                      |               |    | TMF1                | F             | F  |
|                       |               |    |                      |               |    | TRIM36              | T             | F  |
|                       |               |    |                      |               |    | VBP1                | T             | F  |
|                       |               |    |                      |               |    | VDAC2               | T             | F  |
|                       |               |    |                      |               |    | ZNF238              | F             | T  |
|                       |               |    |                      |               |    | ZNF281              | F             | T  |
|                       |               |    |                      |               |    | ZNF804A             | T             | T  |

T: True; F: False





**Supplementary Table S8. Previous Report about Candidates microRNAs in AML**

| MicroRNA   | Location | Family | Expression   | Sample   | Experiment vs. Control                                  |
|------------|----------|--------|--------------|----------|---------------------------------------------------------|
| miRNA-196b | 7p15     | 196    | Up regulated | Adults   | AML vs. ALL (1)                                         |
|            |          |        |              |          | FLT3 AML vs. other AML (2)                              |
|            |          |        |              |          | NPM1 AML vs. other AML (2, 3)                           |
|            |          |        |              |          | MLL rearrangements AML vs. other AML (4)                |
|            |          |        |              | Children | FLT3, NPM1, or MLL rearrangements AML vs. other AML (5) |
|            |          |        |              |          | MLL rearrangements AML vs. other AML (6)                |
| miRNA-155  | 21q21    | 155    | Up regulated | Adults   | AML vs. healthy donors (bone marrow) (7, 8)             |
|            |          |        |              |          | FLT3 AML vs. other AML(3, 9, 10)                        |
|            |          |        |              |          | NPM1 AML vs. other AML (2)                              |
|            |          |        |              | Children | FLT3 or NPM1 AML vs. other AML (5)                      |

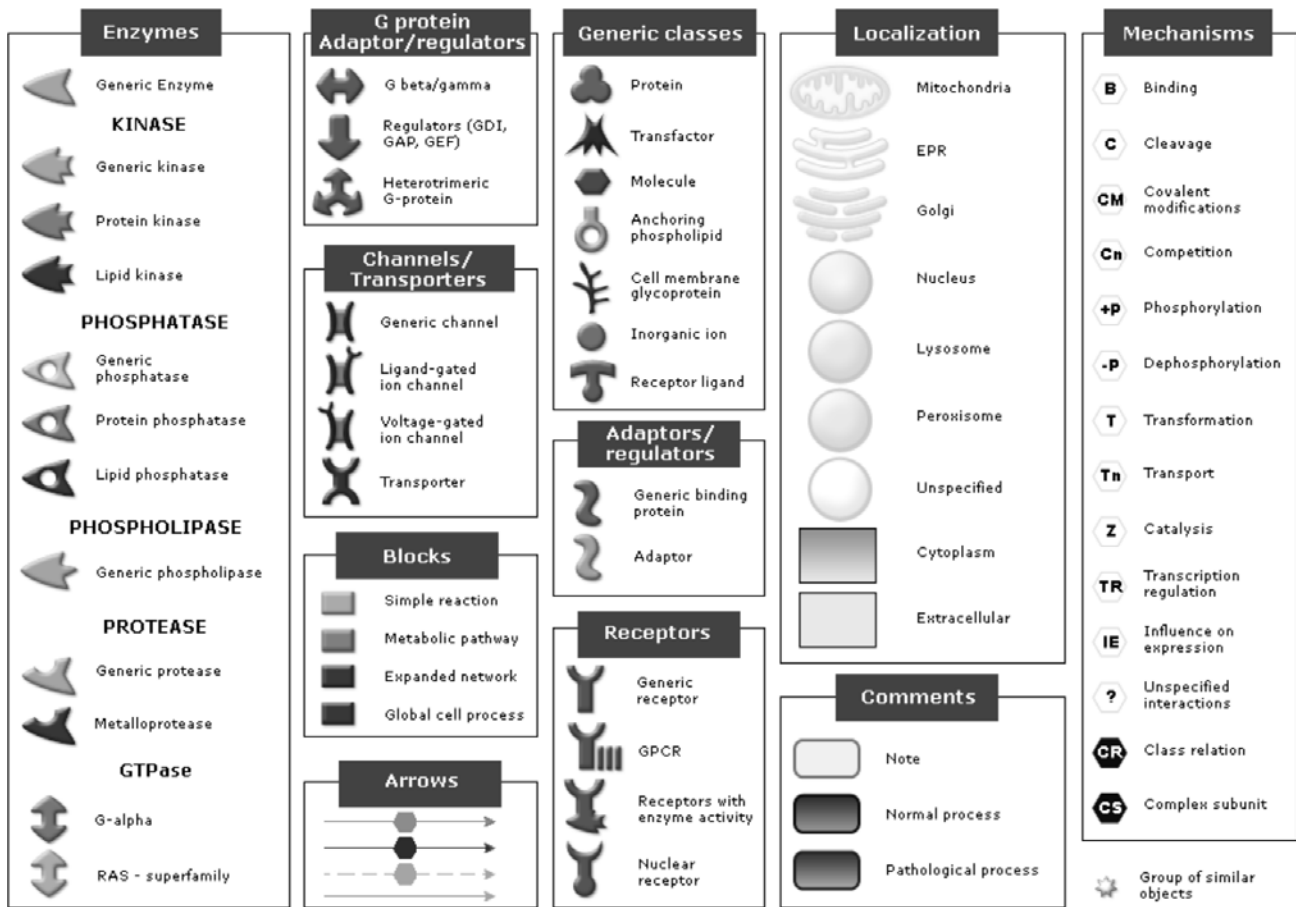

Supplementary Figure S1: Detailed figure legend for MetaCore (GeneGo) pathway maps and networks <http://www.genego.com/>

## REFERENCES

1. Wang, Y., Z. Li, C. He, D. Wang, X. Yuan, J. Chen, et al. MicroRNAs expression signatures are associated with lineage and survival in acute leukemias. *Blood Cells Mol Dis.* 2010; 44:191–7.
2. Cammarata, G., L. Augugliaro, D. Salemi, C. Agueli, M. La Rosa, L. Dagnino, et al. Differential expression of specific microRNA and their targets in acute myeloid leukemia. *Am J Hematol.* 2010; 85:331–9.
3. Jongen-Lavrencic, M., S.M. Sun, M.K. Dijkstra, P.J. Valk, B. Lowenberg. MicroRNA expression profiling in relation to the genetic heterogeneity of acute myeloid leukemia. *Blood.* 2008; 111:5078–85.
4. Li, Z., J. Lu, M. Sun, S. Mi, H. Zhang, R.T. Luo, et al. Distinct microRNA expression profiles in acute myeloid leukemia with common translocations. *Proc Natl Acad Sci U S A.* 2008; 105:15535–40.
5. Danen-van Oorschot, A.A., J.E. Kuipers, S. Arentsen-Peters, D. Schotte, V. de Haas, J. Trka, et al. Differentially expressed miRNAs in cytogenetic and molecular subtypes of pediatric acute myeloid leukemia. *Pediatr Blood Cancer.* 2012; 58:715–21.
6. Daschkey, S., S. Rottgers, A. Giri, J. Bradtke, A. Teigler-Schlegel, G. Meister, et al. MicroRNAs distinguish cytogenetic subgroups in pediatric AML and contribute to complex regulatory networks in AML-relevant pathways. *PLoS One.* 2013; 8:e56334.
7. Dixon-McIver, A., P. East, C.A. Mein, J.B. Cazier, G. Molloy, T. Chaplin, et al. Distinctive patterns of microRNA expression associated with karyotype in acute myeloid leukaemia. *PLoS One.* 2008; 3:e2141.
8. O’Connell, R.M., D.S. Rao, A.A. Chaudhuri, M.P. Boldin, K.D. Taganov, J. Nicoll, et al.. Sustained expression of microRNA-155 in hematopoietic stem cells causes a myeloproliferative disorder. *J Exp Med.* 2008; 205:585–94.
9. Garzon, R., S. Volinia, C.G. Liu, C. Fernandez-Cymering, T. Palumbo, F. Pichiorri, et al. MicroRNA signatures associated with cytogenetics and prognosis in acute myeloid leukemia. *Blood.* 2008; 111:3183–9.
10. Garzon, R., M. Garofalo, M.P. Martelli, R. Briesewitz, L. Wang, C. Fernandez-Cymering, et al. Distinctive
